# Supplementary material
Source: publisher site journal article supplement (https://www.dovepress.com/article/449268)
Supplement: Supplementary file 1 [file get_supplementary_file.php]

*Supplementary material*

**Table S1.** Multiple reaction monitoring parameters of mass spectrometer detector.

| Compounds | Molecular weight | Parent ion | Product ion | Fragmentor (V) | Collision energy (eV) | | Polarity | |
| --- | --- | --- | --- | --- | --- | --- | --- | --- |
| KukoaMine B | 530.66 | 531.3 | 293.2 | 150 | 28 | + | |
| Mulberroside A | 568.52 | 566.9 | 242.6 | 260 | 20 | - | |
| Liquiritin | 418.4 | 416.9 | 254.9 | 180 | 14 | - | |
| Liquiritin apioside | 550.51 | 549.1 | 255.1 | 245 | 30 | - | |
| Glycyrrhizic acid ammonium salt | 822.94 | 823.3 | 453.3 | 185 | 27 | + | |
| Schisandrin (IS) | 432.51 | 433.0 | 384.1 | 80 | 20 | + | |
| Digoxin (IS) | 780.95 | 825.1 | 779.1 | 205 | 22 | - | |

The "+" indicates that the compound was detected using the ESI+ ionization mode of the mass spectrometry detector. The "-" indicates that the compound was detected using the ESI- ionization mode of the mass spectrometry detection.

**Table S2.** Calibration curves, LODs and LOQs of 8 analytes.

| Analytes | Regression equation | R | Test range  (μg/mL) | LODs  (μg/mL) | LOQs  (μg/mL) |
| --- | --- | --- | --- | --- | --- |
| Mulberroside A | A = 43.323c + 65.164 | 0.9999 | 14.84-475.00 | 0.38 | 1.27 |
| KukoaMine B | A = 13.268c + 20.081 | 0.9998 | 5.53-354.00 | 0.62 | 2.07 |
| Kukoamine A | A = 14.281c + 14.520 | 0.9999 | 4.88-312.00 | 0.17 | 0.57 |
| Liquiritin | A = 72.110c + 61.312 | 0.9999 | 2.95-189.00 | 0.69 | 2.30 |
| Liquiritin apioside | A = 38.034c + 47.670 | 0.9999 | 4.375-280.00 | 0.97 | 3.23 |
| Oxyresveratrol | A = 74.726c + 33.386 | 0.9998 | 1.64-105.00 | 0.41 | 0.14 |
| Glycyrrhizic acid ammonium salt | A = 4.846c + 9.768 | 0.9998 | 4.41-282.00 | 0.35 | 1.17 |
| Mulberroside C | A = 6.666c + 6.015 | 0.9999 | 3.16-202.00 | 0.71 | 2.37 |

A, Peak area count; c, concentration of standards (μg/mL).

**Table S3.** Precisions of 8 analytes

| Analytes | intra-day (RSD, %, n=6) | | | inter-day (RSD, %, n=6) | | |
| --- | --- | --- | --- | --- | --- | --- |
| low | medium | high | low | medium | high |
| Mulberroside A | 0.30 | 0.12 | 0.17 | 1.05 | 0.49 | 0.62 |
| KukoaMine B | 1.02 | 0.38 | 0.20 | 2.01 | 0.38 | 0.04 |
| Kukoamine A | 0.90 | 0.26 | 0.16 | 3.21 | 0.67 | 2.70 |
| Liquiritin | 0.20 | 0.22 | 0.15 | 1.57 | 0.41 | 0.42 |
| Liquiritin apioside | 0.20 | 0.20 | 0.16 | 1.81 | 0.42 | 0.40 |
| Oxyresveratrol | 0.84 | 0.11 | 0.18 | 2.48 | 0.58 | 0.79 |
| Glycyrrhizic acid ammonium salt | 0.33 | 0.22 | 1.16 | 1.50 | 0.46 | 0.32 |
| Mulberroside C | 0.45 | 0.12 | 0.18 | 1.90 | 0.41 | 0.71 |

**Table S4.** Repeatabilities, stabilities and recovery of 8 analyte

| Analytes | Repeatability (n=6)  (RSD, %) | Stability (n=6, 24 h)  (RSD, %) | Recovery (n=3) | |
| --- | --- | --- | --- | --- |
| mean | (RSD, %) |
| Mulberroside A | 0.13 | 0.87 | 96.00 | 0.37 |
| KukoaMine B | 0.85 | 2.75 | 98.51 | 1.91 |
| Kukoamine A | 0.66 | 2.97 | 102.60 | 1.36 |
| Liquiritin | 0.35 | 2.13 | 97.86 | 2.01 |
| Liquiritin apioside | 0.15 | 2.31 | 95.84 | 0.75 |
| Oxyresveratrol | 3.41 | 2.70 | 96.84 | 7.46 |
| Glycyrrhizic acid ammonium salt | 2.33 | 2.79 | 101.79 | 1.54 |
| Mulberroside C | 2.77 | 1.84 | 95.88 | 1.28 |

**Table S5.** The regression equations, linear range and LLOQs of the five analytes.

| Component | Regression  equation | Correlation  coefficient(r) | Linear range  (ng/mL) | LLOQ  (ng/mL) |
| --- | --- | --- | --- | --- |
| Mulberroside A | y=1.0832x -0.0333 | 0.9998 | 13.13～1680.15 | 3.16 |
| KukoaMine B | y=1.2527x-0.9879 | 0.9962 | 18.42～589.38 | 16.25 |
| Liquiritin | y=19.1154x -0.3050 | 0.9991 | 3.94～1259.64 | 1.48 |
| Liquiritin apioside | y=5.9867x -0.0436 | 0.9994 | 1.68～672.31 | 1.49 |
| Glycyrrhizic acid ammonium salt | y=33.2417x -0.2467 | 0.9993 | 1.26～504.65 | 1.11 |

**Table S6.** Precision and accuracy of 5 components in rat plasma (n = 6).

|  | | | Concentration（ng/mL） | | Intra-day | | | Inter-day | | |
| --- | --- | --- | --- | --- | --- | --- | --- | --- | --- | --- |
| Component |  | | Mean | RSD  （%） | RE(%) | Mean | RSD  （%） | RE(%) | |
| Mulberroside A | | | 84.08 | 78.55 | 4.17 | -6.57 | 83.26 | 12.72 | -0.97 | |
| 420.04 | 398.75 | 4.00 | -5.07 | 471.78 | 11.89 | 12.32 | |
| 840.08 | 789.60 | 4.00 | -6.01 | 836.92 | 3.65 | -0.37 | |
| KukoaMine B | | | 36.84 | 32.86 | 6.55 | -10.8 | 35.75 | 7.90 | -2.96 | |
| 147.34 | 150.10 | 4.91 | 1.87 | 149.46 | 5.70 | 1.44 | |
| 294.69 | 286.70 | 3.11 | -2.71 | 303.76 | 1.60 | 3.08 | |
| Liquiritin | | | 15.75 | 14.88 | 3.69 | -5.49 | 13.73 | 11.02 | -12.8 | |
| 314.91 | 301.78 | 3.99 | -4.17 | 331.31 | 4.26 | 5.21 | |
| 629.82 | 628.98 | 2.45 | -0.13 | 655.45 | 2.52 | 4.07 | |
| Liquiritin apioside | | | 8.04 | 7.27 | 2.87 | -9.54 | 8.63 | 12.85 | 7.32 | |
| 168.08 | 155.97 | 3.35 | -7.2 | 148.80 | 12.20 | -11.47 | |
| 336.15 | 324.25 | 2.43 | -3.54 | 290.19 | 2.53 | -13.67 | |
| Glycyrrhizic acid ammonium salt | | | 6.31 | 6.17 | 1.17 | -2.16 | 6.72 | 5.79 | 6.51 | |
| 126.16 | 124.34 | 2.71 | -1.44 | 129.48 | 3.67 | 2.63 | |
| 252.33 | 247.51 | 1.19 | -1.91 | 285.83 | 12.62 | 13.28 | |

**Table S7.** Matrix effect and recovery of five components from rat plasma (n =6).

| Component | | Concentration（ng/mL） | | Mean  recovery (%)  mean ± SD | | RSD (%) | Matrix  effect (%)  mean ± SD | | RSD (%) |
| --- | --- | --- | --- | --- | --- | --- | --- | --- | --- |
| Mulberroside A | | 84.08 | 99.26±5.64 | 5.68 | | | 103.98±7.94 | 7.35 |
| 420.04 | 96.04±8.18 | 8.52 | | | 113.81±8.17 | 7.18 |
| 840.08 | 102.53±11.26 | 10.98 | | | 107.76±3.02 | 2.80 |
| KukoaMine B | | 36.84 | 28.59±1.20 | 4.20 | | | 109.73±6.57 | 5.99 |
| 147.34 | 27.811±3.15 | 11.33 | | | 103.63±10.22 | 9.86 |
| 294.69 | 34.616±2.55 | 7.37 | | | 89.40±6.44 | 7.20 |
| Liquiritin | | 15.75 | 94.74±6.41 | 6.77 | | | 105.41±10.91 | 10.35 |
| 314.91 | 97.00±4.11 | 4.24 | | | 106.90±3.86 | 3.61 |
| 629.82 | 100.34±9.90 | 9.87 | | | 110.30±8.88 | 8.05 |
| Liguiritigenin-7-O-D-apiosyl-4'-O-D-glucoside | | 8.04 | 93.22±5.98 | 6.41 | | | 106.06±10.30 | 9.71 |
| 168.08 | 95.75±2.62 | 2.74 | | | 108.47±6.68 | 6.16 |
| 336.15 | 87.25±1.04 | 11.92 | | | 113.16±8.52 | 7.53 |
| Glycyrrhizic acid ammonium salt | | 6.31 | 98.10±4.70 | 4.79 | | | 104.70±9.88 | 9.44 |
| 126.16 | 96.25±3.36 | 3.49 | | | 111.47±2.29 | 2.05 |
| 252.33 | 94.89±4.01 | 4.23 | | | 114.31±6.82 | 5.97 |

**Table S8.** Stability of five components in rat plasma at three QC levels (n =6).

| Component | Concentration (ng/mL) | Stability during 24 h at 4℃ | | Three freeze-thaw cycles | | -80°C for 30 days | |
| --- | --- | --- | --- | --- | --- | --- | --- |
| RSD (%) | RE (%) | RSD (%) | RE (%) | RSD (%) | RE (%) |
| Mulberroside A | 84.075 | 8.17 | 1.90 | 10.23 | 10.38 | 4.74 | 11.86 |
| 420.038 | 4.80 | -0.07 | 6.50 | 11.64 | 5.20 | 2.17 |
| 840.075 | 4.61 | 10.07 | 8.58 | 12.60 | 5.49 | 8.58 |
| KukoaMine B | 29.469 | 14.09 | -2.46 | 14.30 | -7.50 | 11.05 | -10.49 |
| 147.344 | 10.44 | 0.64 | 10.29 | 0.15 | 12.37 | 2.69 |
| 294.688 | 8.96 | -5.10 | 3.18 | 0.31 | 7.16 | -3.61 |
| Liquiritin | 62.982 | 8.07 | -12.96 | 11.32 | -5.14 | 11.91 | -9.81 |
| 314.910 | 6.22 | -7.30 | 6.19 | -10.26 | 5.23 | -10.48 |
| 629.820 | 6.91 | -3.94 | 6.40 | -7.03 | 6.83 | -9.41 |
| Liguiritigenin-7-O-D-apiosyl-4'-O-D-glucoside | 33.615 | 3.76 | -13.65 | 8.58 | -14.99 | 11.00 | -11.74 |
| 168.077 | 6.56 | -3.83 | 6.16 | -7.61 | 6.16 | -8.62 |
| 336.154 | 4.41 | -5.45 | 6.33 | -5.89 | 5.14 | -7.29 |
| Glycyrrhizic acid ammonium salt | 15.770 | 8.33 | -10.52 | 9.67 | -12.69 | 5.50 | -14.59 |
| 126.163 | 9.47 | -8.58 | 8.36 | -12.62 | 10.18 | -12.15 |
| 252.326 | 10.17 | 0.29 | 12.93 | -0.14 | 14.05 | 2.25 |
